# Supplementary material for: Dye-sensitized solar cells: spectroscopic evaluation of dye loading on TiO2
Source: Royal Society of Chemistry journal article supplement (doi:10.1039/c2jm30481c), 2012-01-01
Supplement: c2jm30481c.pdf [file c2jm30481c.pdf]

# Dye-sensitized solar cells: spectroscopic evaluation of dye loading on TiO<sub>2</sub>

by Elisa Dell'Orto, Luisa Raimondo, Adele Sassella and Alessandro Abboto

## Electronic Supplementary Information (ESI)

**Fig S1** Example of the fitting results of the absorption spectrum of N719-coated TiO<sub>2</sub> films after 24 h dye-dipping time. The fitting procedure has been adopted for determining the area of the 540 nm band of N719-coated TiO<sub>2</sub> films.

**Fig S2** Integrated area of the absorption spectra in the spectral range 460 ÷ 800 nm of N719 adsorbed into TiO<sub>2</sub> films vs. dipping time (inset: enlargement from 5 s to 7 h).

**Fig S3** Absorption spectra of the desorbed solution for dipping time of 3 h and a freshly prepared solution of the N719 sensitizer ( $2.0 \times 10^{-6}$  M) in the same hydroalcoholic NaOH solution (0.1 M NaOH in H<sub>2</sub>O/EtOH 1:1).

**Fig S4** Integrated area of the absorption spectra over the UV-Vis spectral range (277÷800 nm) of desorbed N719 (0.1 M NaOH in H<sub>2</sub>O/EtOH 1:1) vs. dipping times of the original films.

**Fig S5** Integrated area of the of the absorption peak centered at about 510 nm of desorbed N719 (0.1 M NaOH in H<sub>2</sub>O/EtOH 1:1) vs. dipping times of the original films. The error bars are enclosed in the symbols.

**Fig S6** Example of the fitting results of the absorption spectrum of the desorbed N719 (0.1 M NaOH in H<sub>2</sub>O/EtOH 1:1) for dipping time of 3 h of the original film.

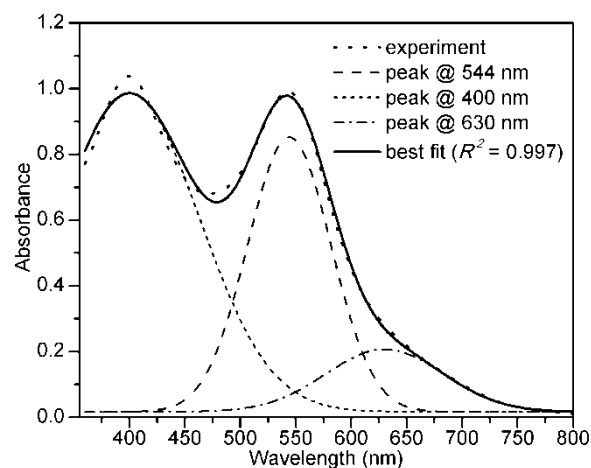

**Fig S1** Example of the fitting results of the absorption spectrum of N719-coated TiO<sub>2</sub> films after 24 h dye-dipping time. The fitting procedure has been adopted for determining the area of the 540 nm band of N719-coated TiO<sub>2</sub> films.

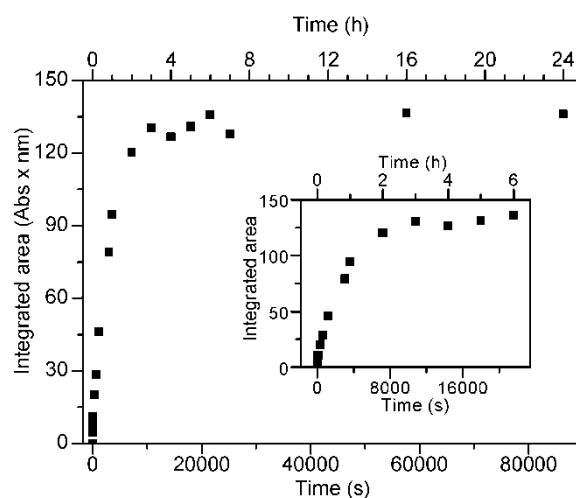

**Fig S2** Integrated area of the absorption spectra in the spectral range 460 ÷ 800 nm of N719 adsorbed into TiO<sub>2</sub> films vs. dipping time (inset: enlargement from 5 s to 7 h).

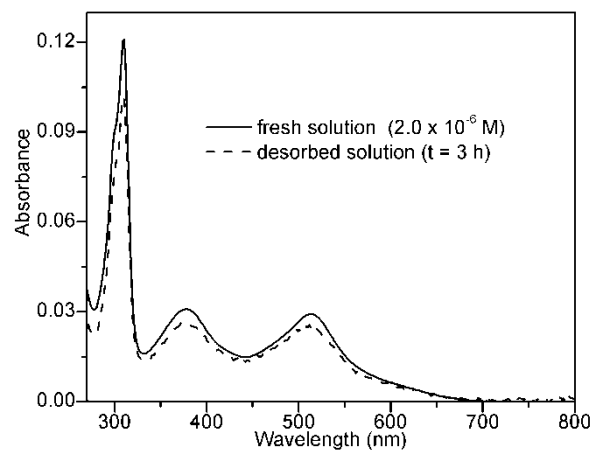

**Fig S3** Absorption spectra of the desorbed solution for dipping time of 3 h and a freshly prepared solution of the N719 sensitizer ( $2.0 \times 10^{-6}$  M) in the same hydroalcoholic NaOH solution (0.1 M NaOH in H<sub>2</sub>O/EtOH 1:1).

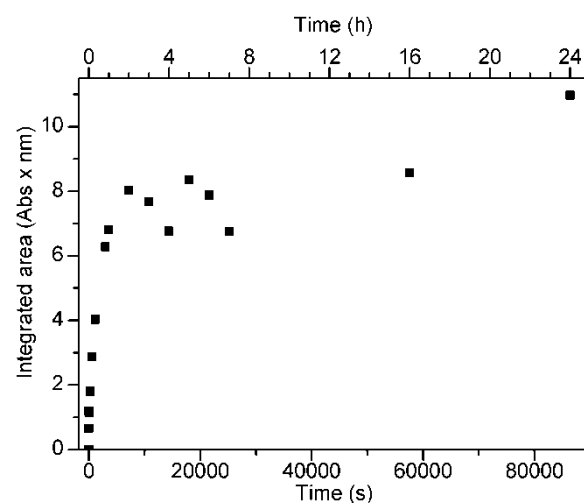

**Fig S4** Integrated area of the of the absorption spectra over the UV-Vis spectral range (277÷800 nm) of desorbed N719 (0.1 M NaOH in H<sub>2</sub>O/EtOH 1:1) vs. dipping times of the original films.

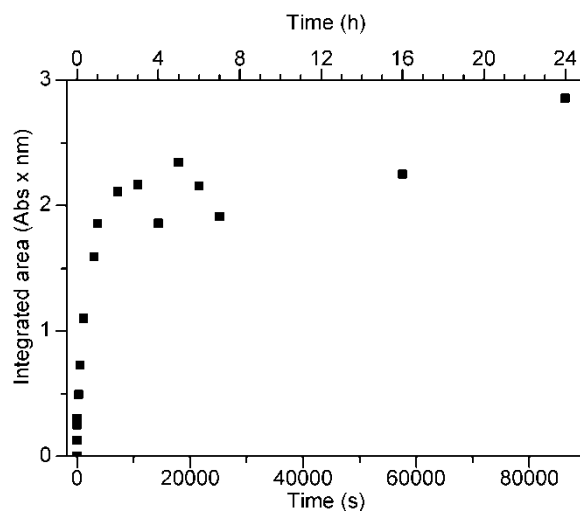

**Fig S5** Integrated area of the absorption peak centered at about 510 nm of desorbed N719 (0.1 M NaOH in H<sub>2</sub>O/EtOH 1:1) vs. dipping times of the original films. The error bars are enclosed in the symbols.

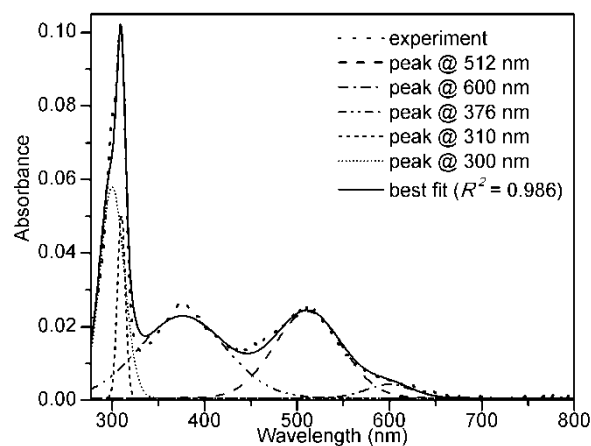

**Fig S6** Example of the fitting results of the absorption spectrum of the desorbed N719 (0.1 M NaOH in H<sub>2</sub>O/EtOH 1:1) for dipping time of 3 h of the original film.
